# Supplementary material for: Comparative Mitogenomes of Two Coreamachilis Species (Microcoryphia: Machilidae) along with Phylogenetic Analyses of Microcoryphia
Source: MDPI journal article supplement (doi:10.3390/insects12090795), 2021-09-05
Supplement: s1 [file s1]

Table S1 CodeML analysis of mitochondrial protein-encoding genes (13 genes) (*Coreamachilis* as the foreground branch)

|                   | Model      | np   | Ln L          | Model compared                | LRT P-value | Positive sites                                                                                                                                                                                                                                                                                                               |
|-------------------|------------|------|---------------|-------------------------------|-------------|------------------------------------------------------------------------------------------------------------------------------------------------------------------------------------------------------------------------------------------------------------------------------------------------------------------------------|
| Branch model      | Two ratio  | 25   | -85287.650122 | Model 0 vs. Two ratio Model 2 | 0.408895446 |                                                                                                                                                                                                                                                                                                                              |
|                   | Model 2    |      |               |                               |             |                                                                                                                                                                                                                                                                                                                              |
|                   | Model 0    | 24   | -85287.991127 |                               |             |                                                                                                                                                                                                                                                                                                                              |
| Branch site model | Model A    | 27   | -83671.873488 | Model A vs. Model A null      | 0.324897750 | 181 G 0.881, 763 A 0.771, 870 L 0.709, 918 V 0.738, 1000 K 0.969*,1014 K 0.509, 1701 S 0.662, 1819 F 0.578, 2005 L 0.624, 2223 L 0.615, 2278 I 0.570, 2356 L 0.509, 2660 G 0.531, 2662 L 0.610, 2671 E 0.858, 3206 P 0.890, 3305 A 0.671, 3353 V 0.782, 3508 L 0.898, 3592 D 0.508, 3603 N 0.844, 3615 S 0.779, 3618 V 0.562 |
|                   | Model null | A 26 | -83672.358052 |                               |             | Not Allowed                                                                                                                                                                                                                                                                                                                  |
|                   | Model null |      |               |                               |             |                                                                                                                                                                                                                                                                                                                              |
| Clade model       | CmC        | 28   | -81557.305666 | M2a_rel vs CmC                | 0.000000000 |                                                                                                                                                                                                                                                                                                                              |
|                   | M2a_rel    | 27   | -81586.915580 |                               |             | Not Allowed                                                                                                                                                                                                                                                                                                                  |
|                   | M3         | 28   | -81387.375872 | M0 vs. M3                     | 0.000000000 |                                                                                                                                                                                                                                                                                                                              |
| Site model        | M0         | 24   | -85287.991127 |                               |             | Not Allowed                                                                                                                                                                                                                                                                                                                  |
|                   | M2a        | 27   | -83679.125055 | M1a vs. M2a                   | 1.000000000 |                                                                                                                                                                                                                                                                                                                              |
|                   | M1a        | 25   | -83679.125055 |                               |             | Not Allowed                                                                                                                                                                                                                                                                                                                  |
|                   | M8         | 27   | -81490.306203 | M7 vs.M8                      | 0.000000000 | 51 S 0.550, 256 L 0.747, 905 D 0.686, 2123 M 0.775, 2236 N 0.904, 2256 T 0.839, 2390 V 0.621, 2458 G 0.543, 2534 N 0.522, 2930 L 0.523, 3391 L 0.804, 3394 V 0.747, 3397 L 0.509, 3597 L 0.661                                                                                                                               |
|                   | M7         | 25   | -81533.937285 |                               |             | Not Allowed                                                                                                                                                                                                                                                                                                                  |
|                   | M8a        | 26   | -81367.132828 | M8a vs.M8                     | 0.000000000 | Not Allowed                                                                                                                                                                                                                                                                                                                  |
