# Supplementary material for: Comparative Mitogenomes of Two Coreamachilis Species (Microcoryphia: Machilidae) along with Phylogenetic Analyses of Microcoryphia
Source: MDPI journal article supplement (doi:10.3390/insects12090795), 2021-09-05
Supplement: s1 [file s1]

Table S2 CodeML analysis of mitochondrial protein-encoding genes (13 genes) (choosing *C. songi* as the foreground branch)

|                   | Model        | np | Ln L          | Model compared                | LRT P-value | Positive sites |
|-------------------|--------------|----|---------------|-------------------------------|-------------|----------------|
| Branch model      | Two ratio    | 25 | -85235.524365 | Model 0 vs. Two ratio Model 2 | 0.000000000 |                |
|                   | Model 2      |    |               |                               |             |                |
| Branch site model | Model 0      | 24 | -85287.991127 | Model A vs. Model A null      | 0.000000000 | Not Allowed    |
|                   | Model A      | 27 | -85235.524365 |                               |             |                |
|                   | Model A null | 26 | -83679.125056 |                               |             |                |
| Clade model       | CmC          | 28 | -81532.325428 | M2a_rel vs CmC                | 0.000000000 | Not Allowed    |
|                   | M2a_rel      | 27 | -81586.915580 |                               |             |                |
