# Supplementary material for: Comparative Mitogenomes of Two Coreamachilis Species (Microcoryphia: Machilidae) along with Phylogenetic Analyses of Microcoryphia
Source: Insects. 2021 Sep 5;12(9):795. doi: 10.3390/insects12090795 (PMC8471023; doi:10.3390/insects12090795)
Supplement: Supplementary file 1 [file insects-12-00795-s001.zip]

Archive with 4 entries (4 files):
- Figure S1 trna.pdf
- Table S1 selection pressure.pdf
- Table S2 selection pressure songi.pdf
- Table S3 selection pressure coreanus.pdf
