# Supplementary figures and images for: Comparative Mitogenomes of Two Coreamachilis Species (Microcoryphia: Machilidae) along with Phylogenetic Analyses of Microcoryphia
Source: MDPI journal article supplement (doi:10.3390/insects12090795), 2021-09-05

A. *C. coreanus*

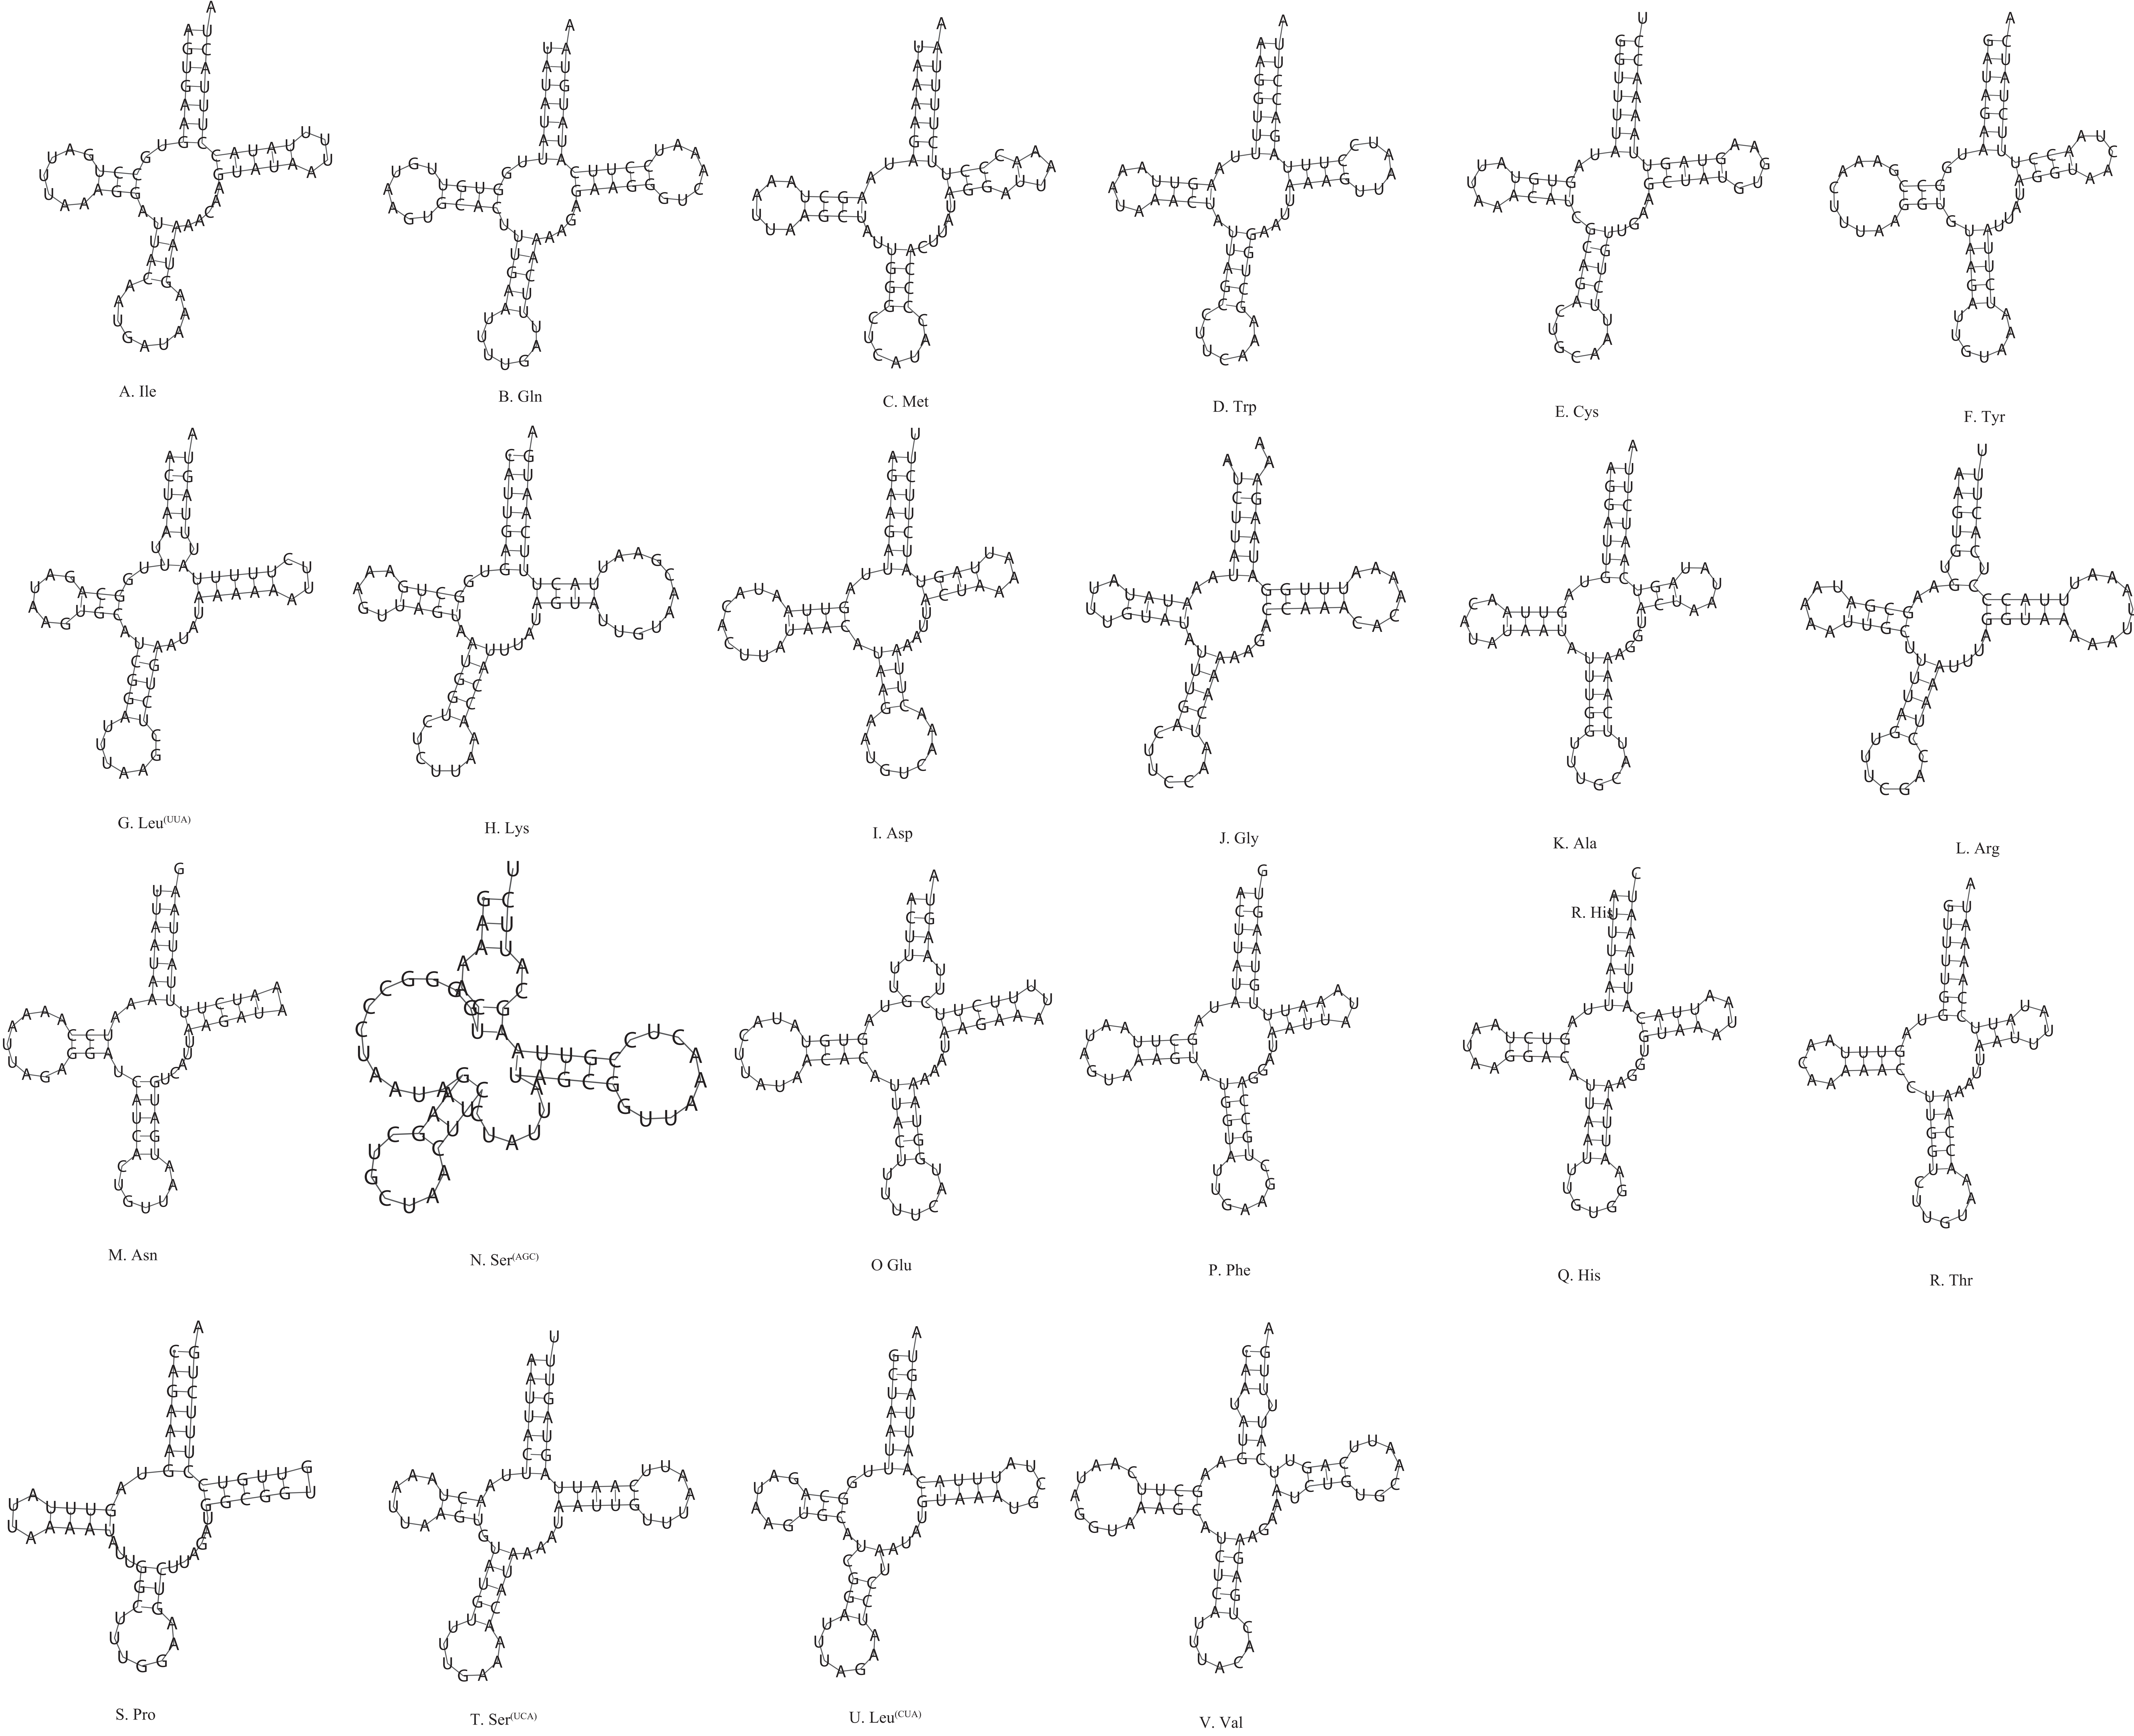

B. *C. songi*

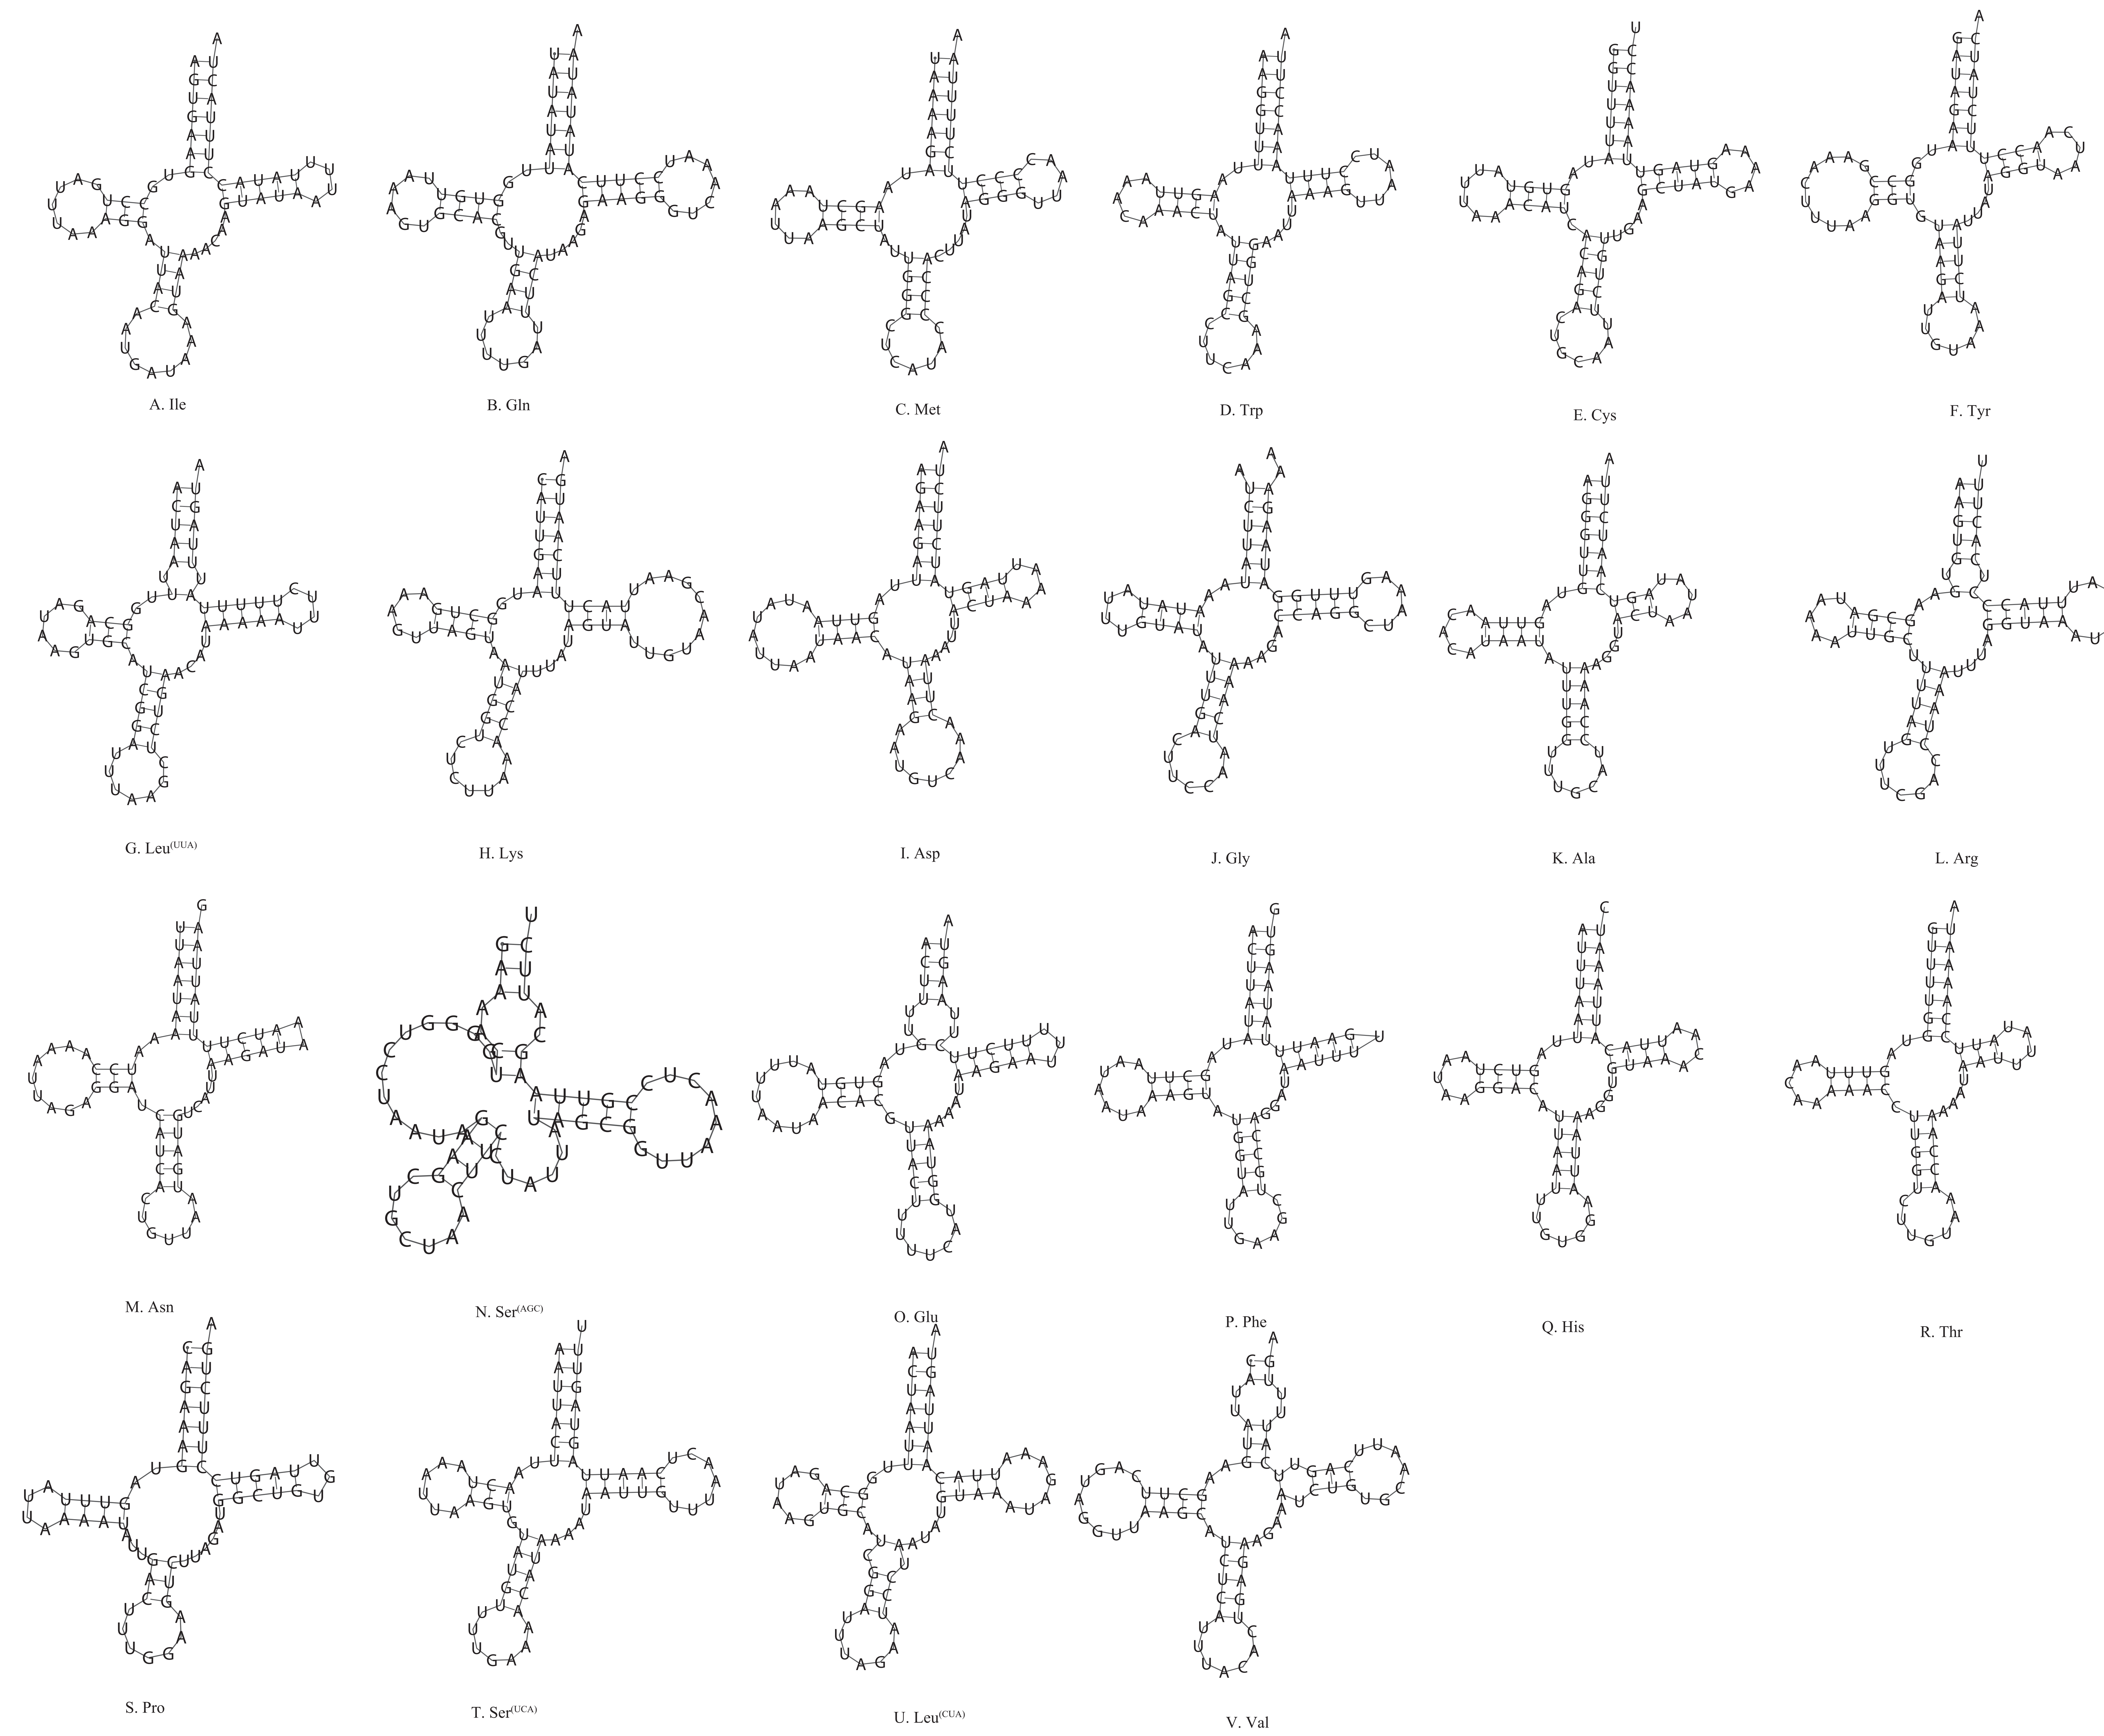

Supplement: s1 [file s1]
